# Supplementary material for: Thermal Healing, Reshaping and Ecofriendly Recycling of Epoxy Resin Crosslinked with Schiff Base of Vanillin and Hexane-1,6-Diamine
Source: PubMed Central journal article supplement (PMC6419216; doi:10.3390/polym11020293), 2019-02-10
Supplement: polymers-11-00293-s001.pdf [file polymers-11-00293-s001.pdf]

1 *Supplementary Materials*

2 **Thermally healing, reshaping and ecofriendly**  
 3 **recycling of epoxy resin crosslinked with Schiff-base**  
 4 **of vanillin and hexane-1,6-diamine**

5 **Van-Dung Mai <sup>1,†</sup>, Se-Ra Shin<sup>1,†</sup>, Dai-Soo Lee <sup>1,\*</sup>, and Ilho Kang <sup>2,\*</sup>**

6 <sup>1</sup> Division of Semiconductor and Chemical Engineering, Chonbuk National University, Baekjedaero 567,  
 7 Deokjin-gu, Jeonju, Chonbuk, 54896, Korea; dungmv1983@gmail.com(D.M.); srshin89@jbnu.ac.kr (S.-R.S.);  
 8 daisoolee@jbnu.ac.kr(D.L.)

9 <sup>2</sup> Research Center, NEPES AMC, 99 Seokam-ro, Iksan, Chonbuk, 54587, Korea; kangilho@nepesamc.co.kr

10 \* Correspondence: daisoolee@jbnu.ac.kr; Tel.: +82-63-270-2310; kangilho@nepesamc.co.kr; +82-63-833-2020

11 Received: date; Accepted: date; Published: date

12 † These authors contributed equally to this work.

13

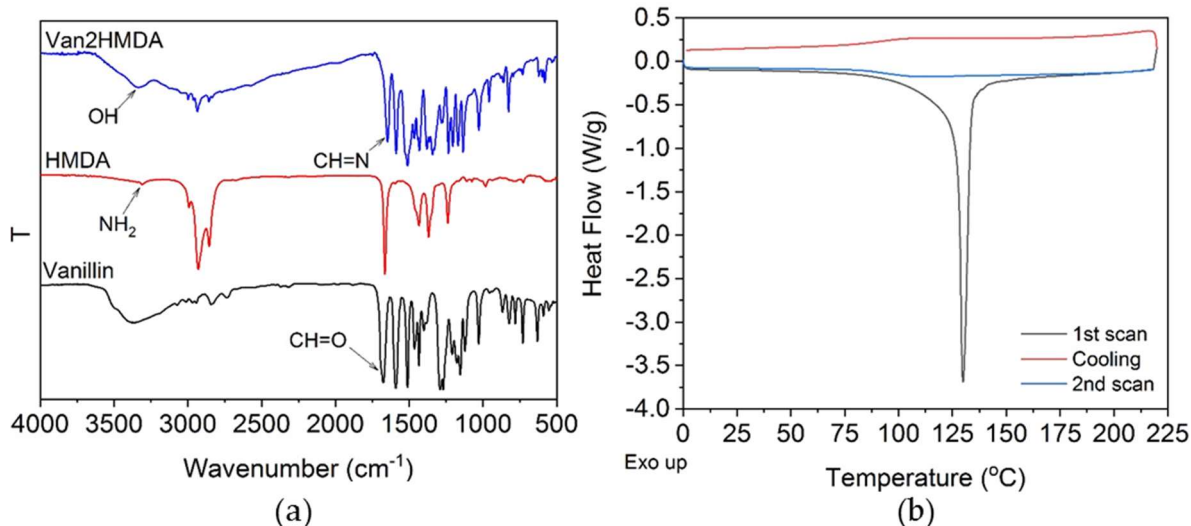

14

15 **Figure S1.** (a) FT-IR spectra of Vanillin, HMDA, and the product (Van2HMDA) by Schiff-based  
 16 formation and (b) DSC thermograms of Van2HMDA.

17

18

19

20

21

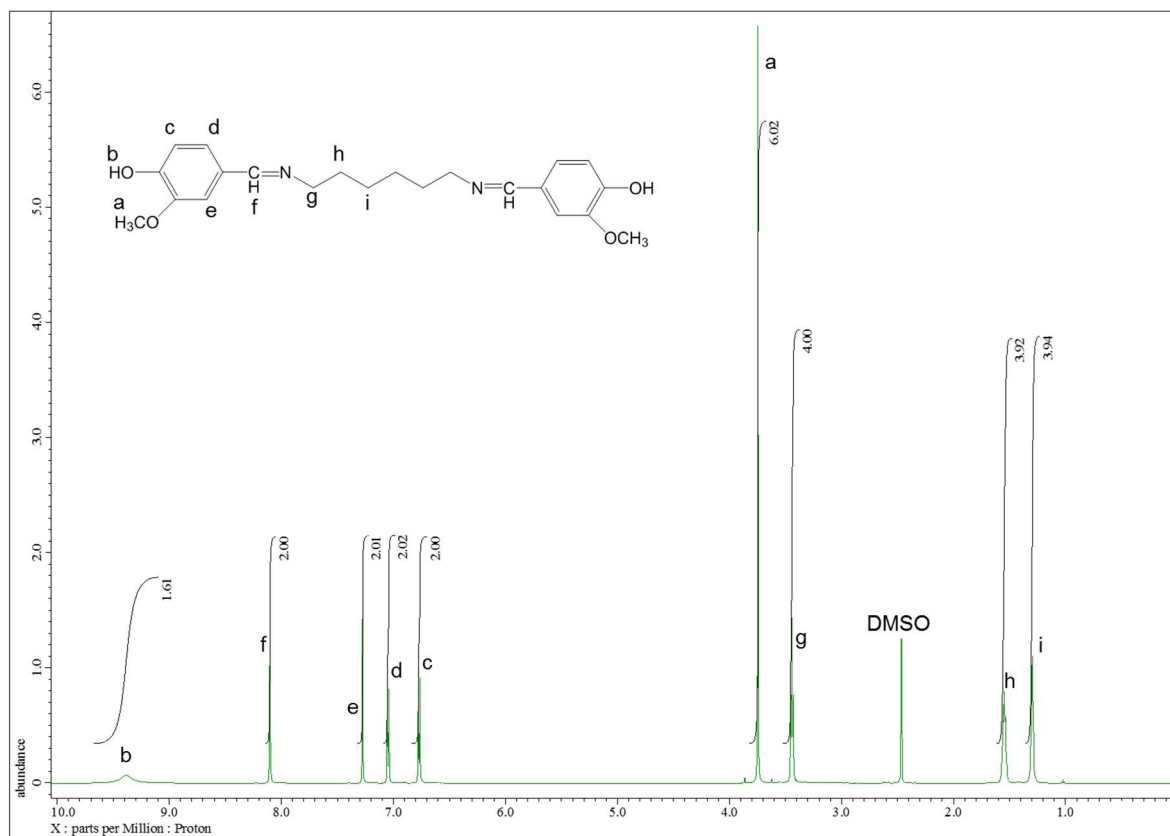

(a)

22

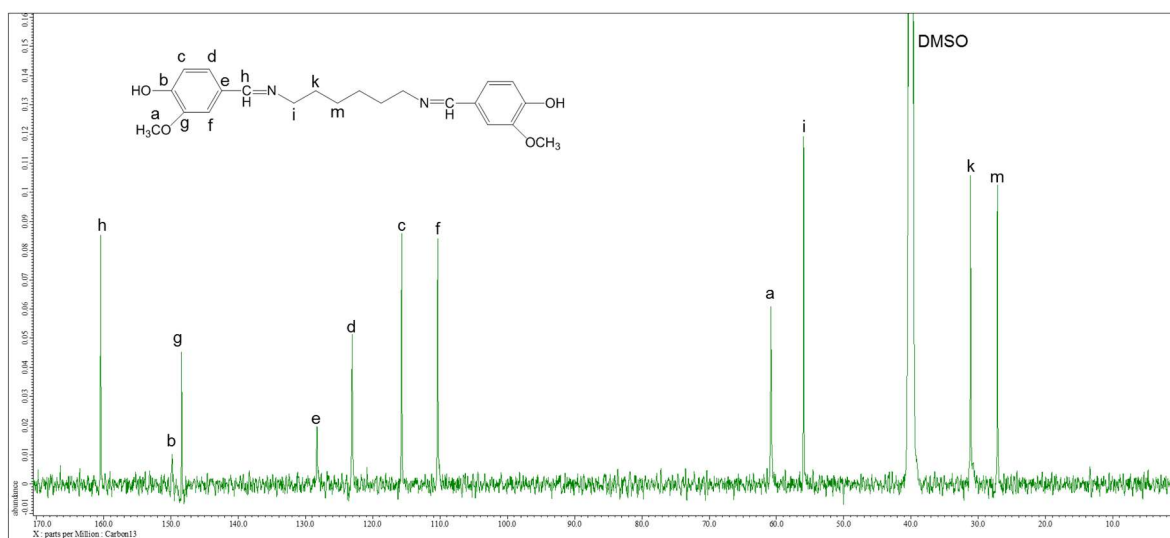

(b)

23

24

**Figure S2.** (a)  $^1\text{H-NMR}$  and (b)  $^{13}\text{C-NMR}$  spectra of Van2HMDA based on Van and HMDA.

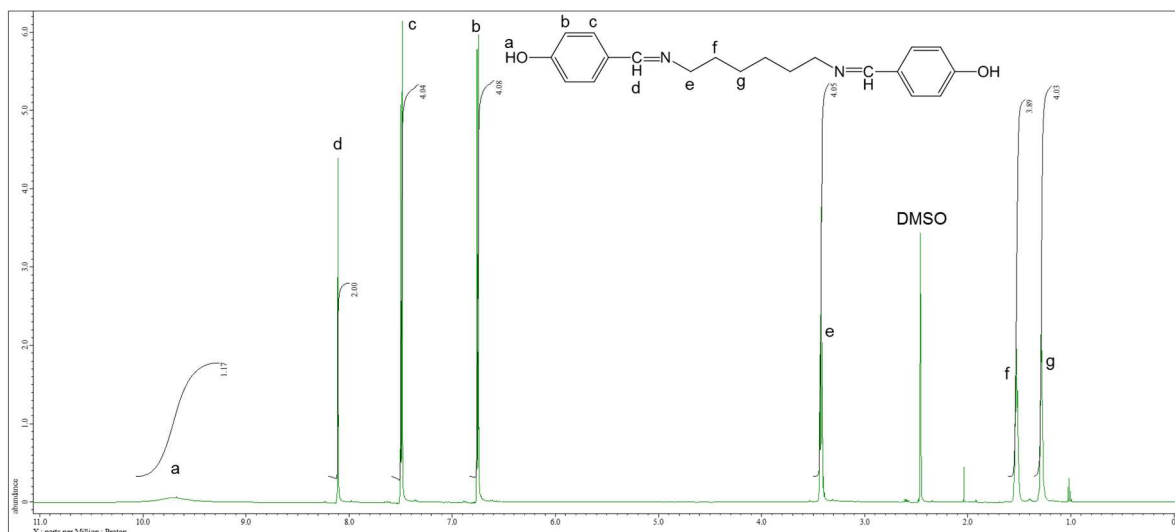

25

(a)

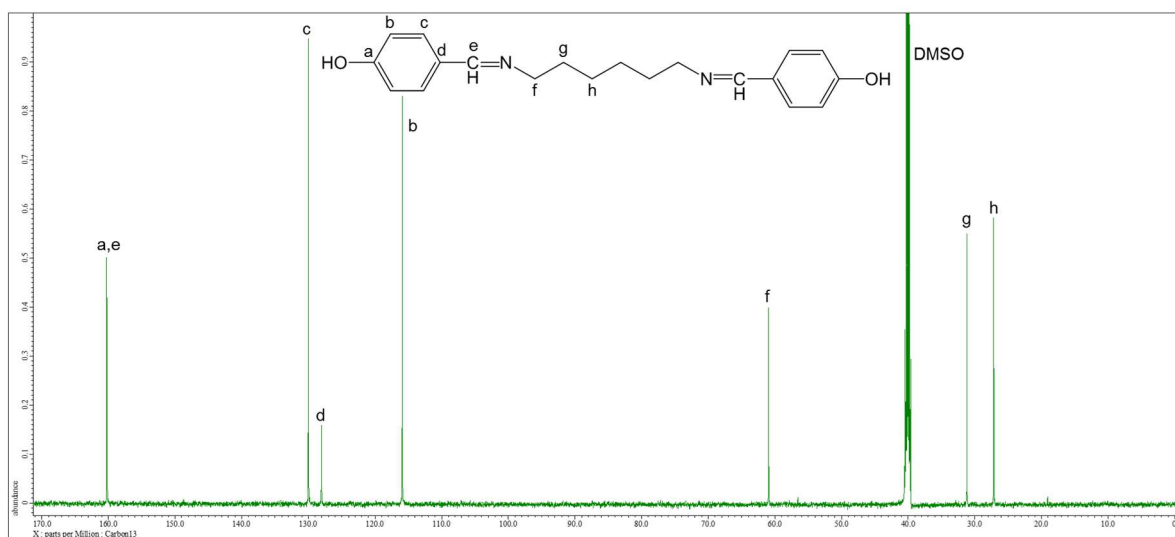

26

(b)

27 **Figure S3.** (a)  $^1\text{H}$ -NMR and (b)  $^{13}\text{C}$ -NMR spectra of model compound HBA2HMDA based on HBA  
28 and HMDA.

29

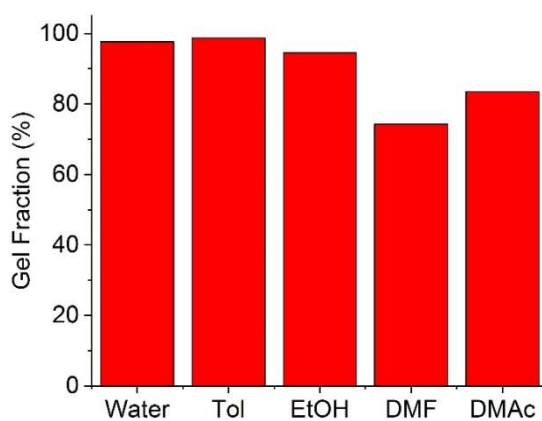

30

31

**Figure S4.** Gel fraction of the epoxy resin cured with Van2HMDA in different solvents.

32

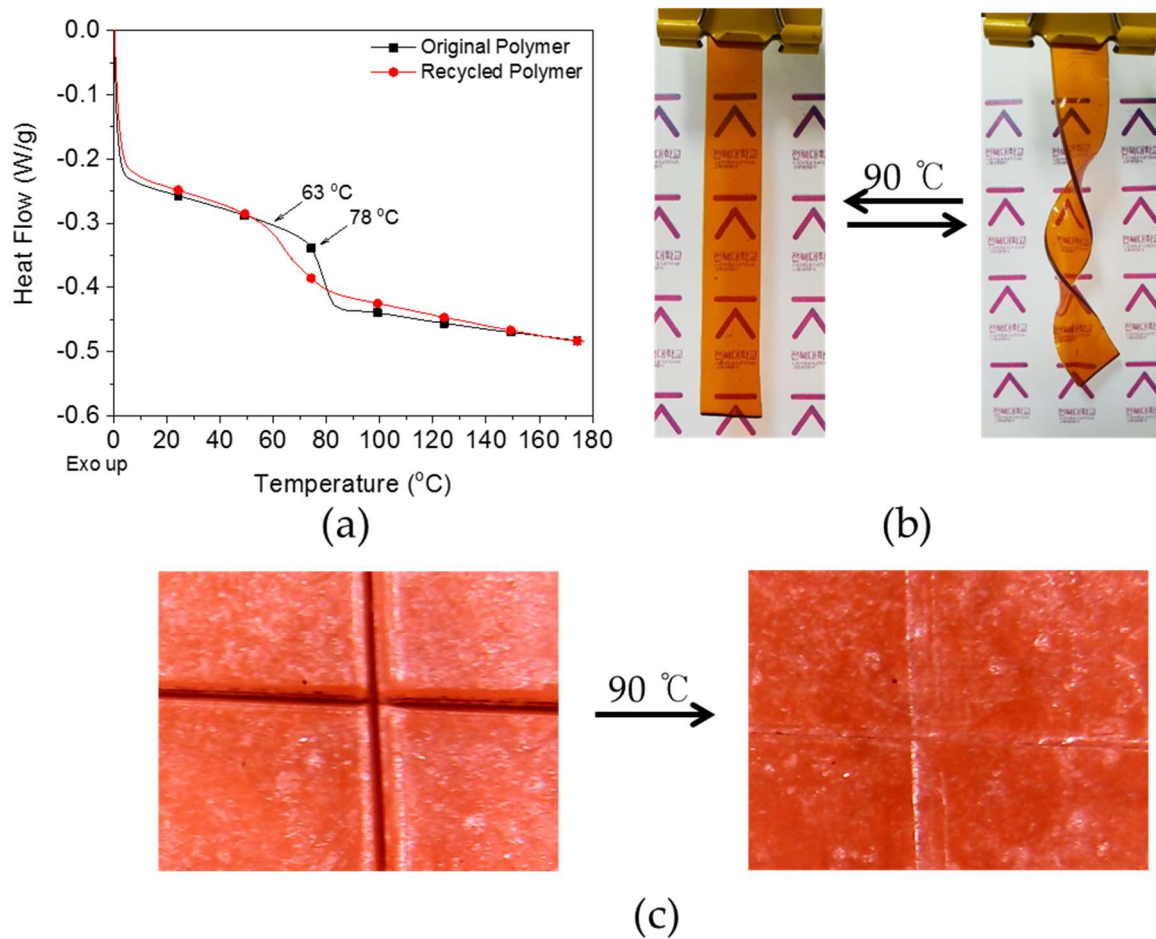

33

34

35

**Figure S5.** (a) DSC thermalgrams of original polymer and recycled polymer, (b) reshaping ability and (c) thermal healing ability of the recycled polymer.

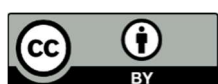

© 2019 by the authors. Submitted for possible open access publication under the terms and conditions of the Creative Commons Attribution (CC BY) license (<http://creativecommons.org/licenses/by/4.0/>).

36
